# Supplementary material for: Adiposity and body fat distribution based on skinfold thicknesses and body circumferences in Czech preschool children, secular changes
Source: PeerJ journal article supplement (doi:10.7717/peerj.18695), 2024-12-13

Bland-Altman plot

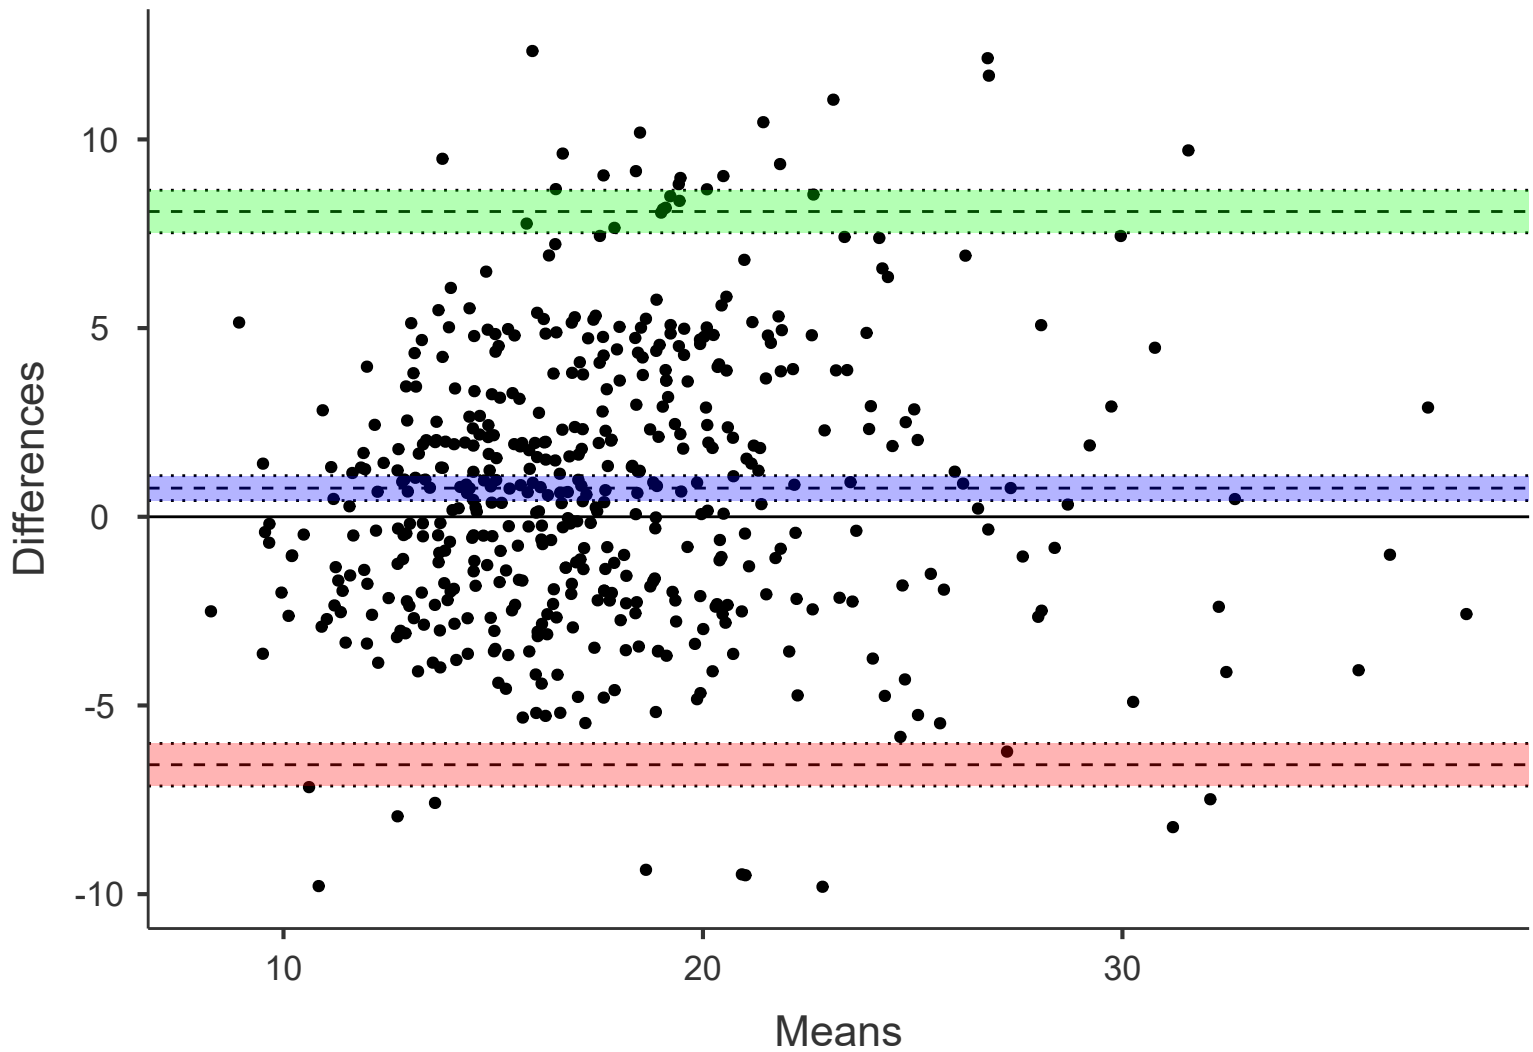

Supplement: Slaughter.pdf [file Slaughter.pdf]
